# Supplementary material
Source: PubMed Central journal article supplement (PMC2993878)
Supplement: NIHMS236883-supplement-01.pdf [file NIHMS236883-supplement-01.pdf]

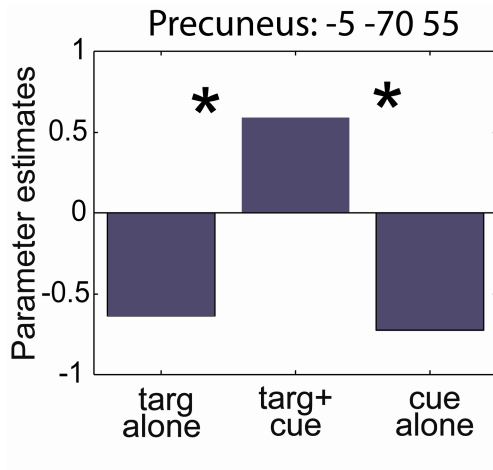

Supplemental Figure 1: Parameter estimates for all three target plus contextual cue conditions in the Precuneus. This precuneus cluster was the only area in addition to left and right TPJ activated in the whole brain analysis of the contrast target+contextual cue minus target alone. The difference between target alone and target + contextual cue trials was significant, ( $t(12)=4.8$ ,  $p < .0005$ ), as was the difference between target + contextual cue and the contextual cue alone,  $t(12) = 7.1$ ,  $p < .0005$ ). The difference between the target alone and cue alone conditions was not significant,  $t(12) = .3$ ,  $p = .7$ ). The results are similar to the pattern found in L TPJ.
